# Supplementary material for: Multilayered semiconducting polymer nanoparticles with enhanced NIR fluorescence for molecular imaging in cells, zebrafish and mice
Source: Royal Society of Chemistry journal article supplement (doi:10.1039/c6sc01251e), 2016-01-01
Supplement: c6sc01251e1.pdf [file c6sc01251e1.pdf]

## Electronic Supplementary Information

### Multilayered Semiconducting Polymer Nanoparticles with Enhanced NIR

#### Fluorescence for Molecular Imaging in Cells, Zebrafish and Mice

Houjuan Zhu,<sup>1, +</sup> Yuan Fang,<sup>2, +</sup> Xu Zhen,<sup>1, +</sup> Na Wei,<sup>1</sup> Gao Yu,<sup>1</sup> Kathy Qian Luo,<sup>3</sup> Chenjie Xu,<sup>1</sup>  
Hongwei Duan,<sup>1</sup> Dan Ding,<sup>2, \*</sup> Peng Chen,<sup>1, \*</sup> Kanyi Pu<sup>1, \*</sup>

<sup>1</sup>School of Chemical and Biomedical Engineering, Nanyang Technological University,  
Singapore, 637457.

Email: chenpeng@ntu.edu.sg; kypu@ntu.edu.sg

<sup>2</sup>State Key Laboratory of Medicinal Chemical Biology, Key Laboratory of Bioactive Materials,  
Ministry of Education, College of Life Sciences, Nankai University.

Email: dingd@nankai.edu.cn

<sup>3</sup>Faculty of Health Sciences, University of Macau, Avenida da Universidade, Taipa, Macau

<sup>+</sup> These authors contributed equally to this work.

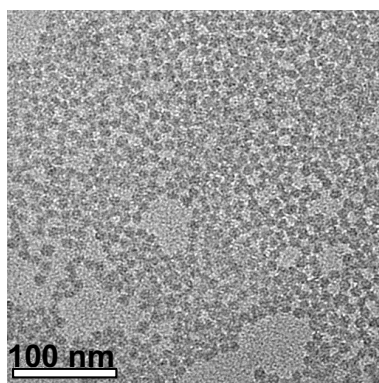

**Figure S1.** TEM of SPNs-Si: SPN4-Si.

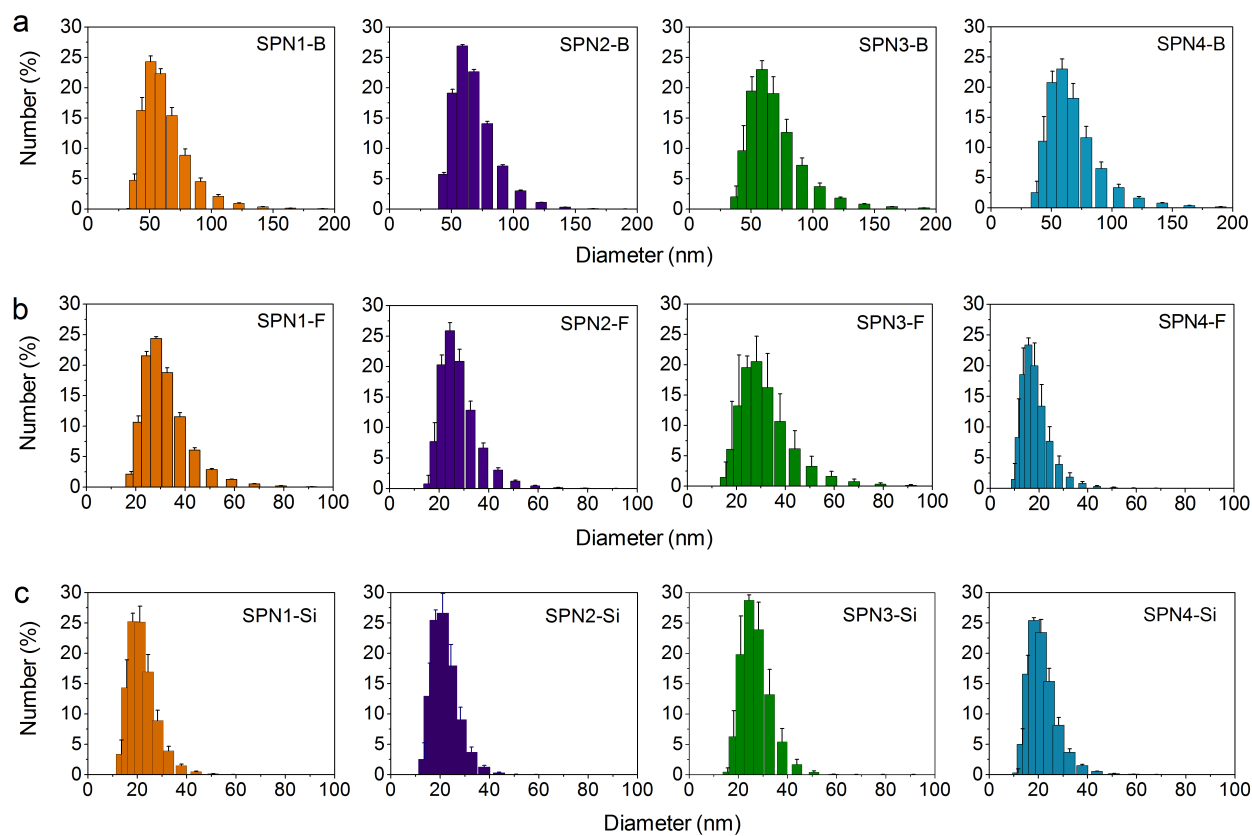

**Figure S2.** DLS of SPNs-B (a), SPNs-F (b) and SPNs-Si (c) in aqueous solution. The error bars represent standard deviations of three separate measurements.

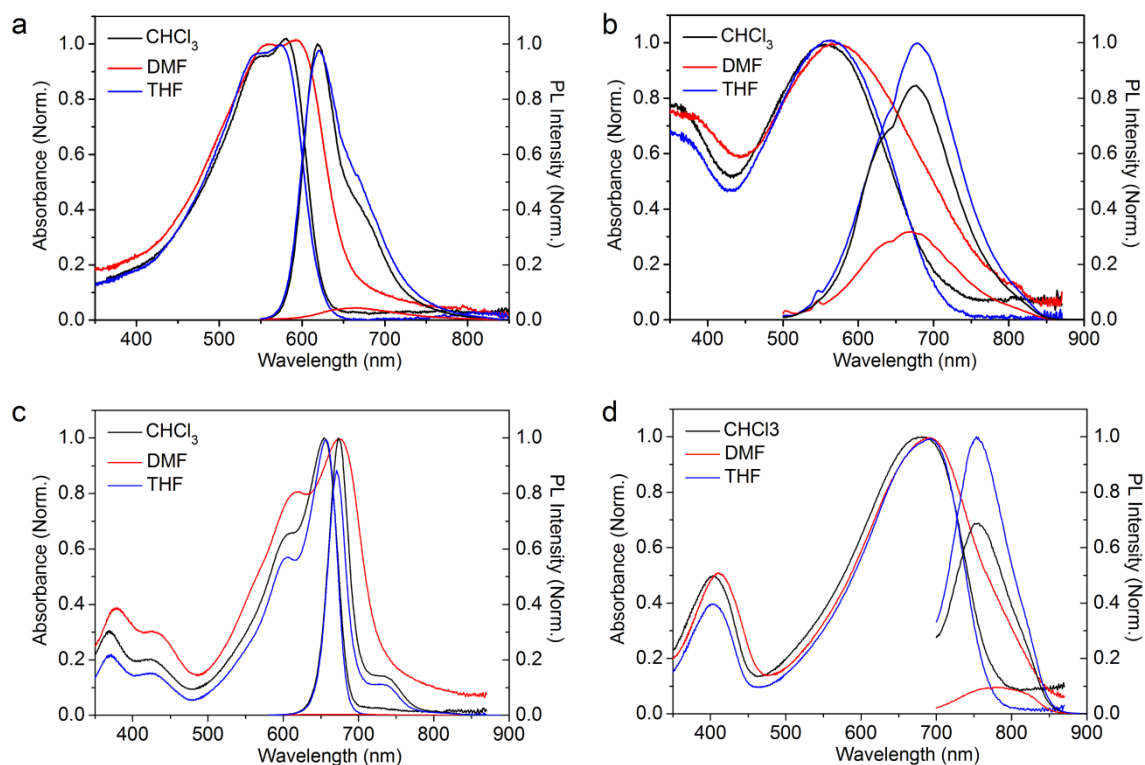

**Figure S3.** UV–Vis absorption and fluorescence spectra of SP1 (a), SP2 (b), SP3 (c), SP4 (d) in  $\text{CHCl}_3$ , THF and DMF. The concentration of SPs is 1.35, 2.25, 2.82 and 2.1  $\mu\text{g/mL}$ , respectively. The excitation wavelengths are 530, 470, 590, and 620 nm for SP1, SP2, SP3 and SP4, respectively.

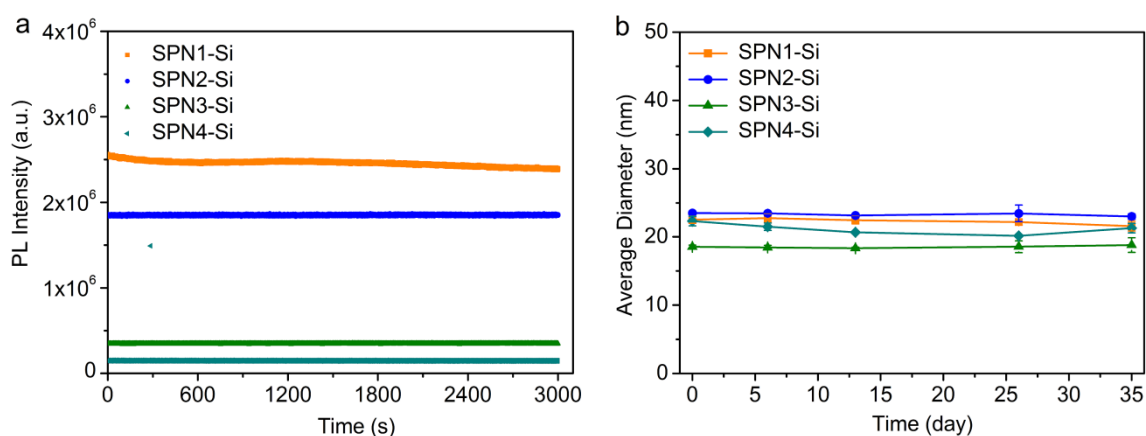

**Figure S4.** (a) Fluorescence intensities of SPNs-Si as a function of time under continuous illumination up to 50 min. (b) The hydrodynamic diameters of SPNs-Si as a function of storage time. The concentrations of SPN1-Si, SPN2-Si, SPN3-Si, SPN4-Si are 1, 1.7, 1.2, and 0.9

$\mu\text{g/mL}$ , respectively.

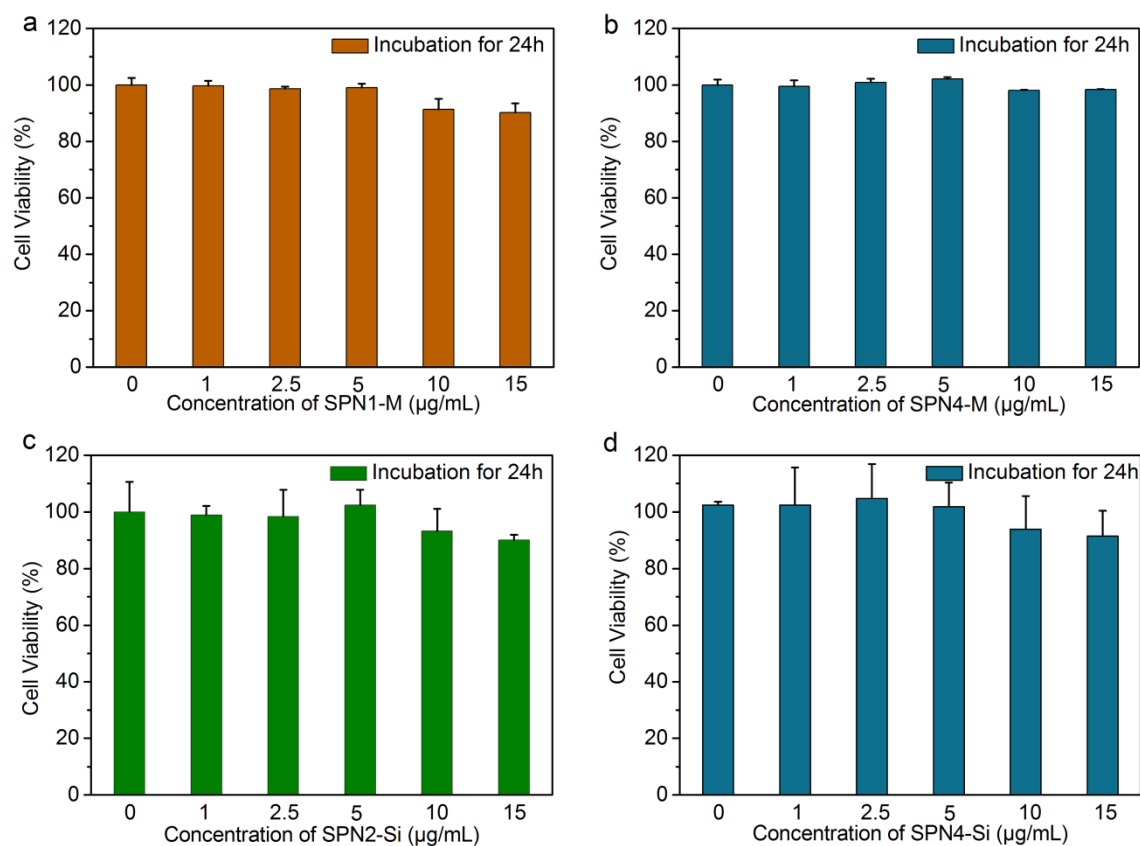

**Figure S5.** Cell viability of HeLa cells after incubation with SPN1-M (a), SPN4-M (b), SPN2-Si (c), SPN4-Si (d) solution at different concentrations for 24 h.

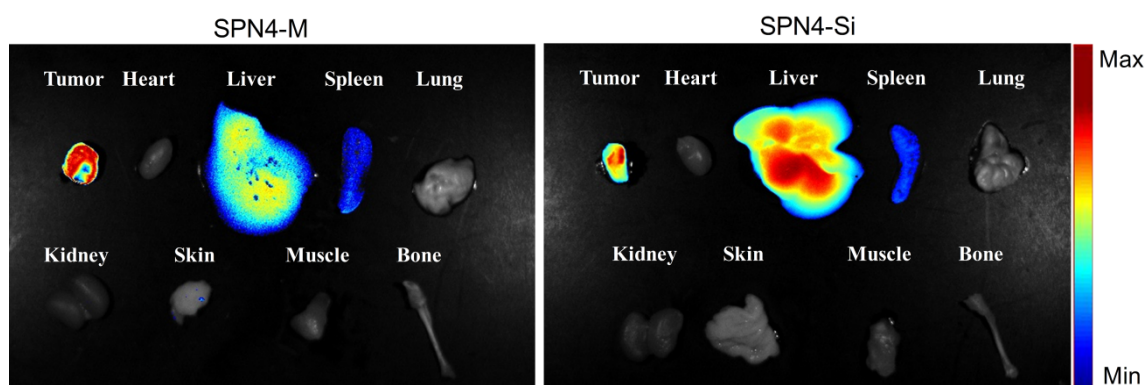

**Figure S6.** *Ex vivo* fluorescence imaging of major organs and tumor tissues from mice treated with SPN4-M or SPN4-Si. The mice were sacrificed at 24 h post-injection.
